# Supplementary material for: Transcriptomics and Immunological Analyses Reveal a Pro-Angiogenic and Anti-Inflammatory Phenotype for Decidual Endothelial Cells
Source: Int J Mol Sci. 2019 Mar 31;20(7):1604. doi: 10.3390/ijms20071604 (PMC6479455; doi:10.3390/ijms20071604)
Supplement: Supplementary file 1 [file ijms-20-01604-s001.pdf]

Supplementary Materials

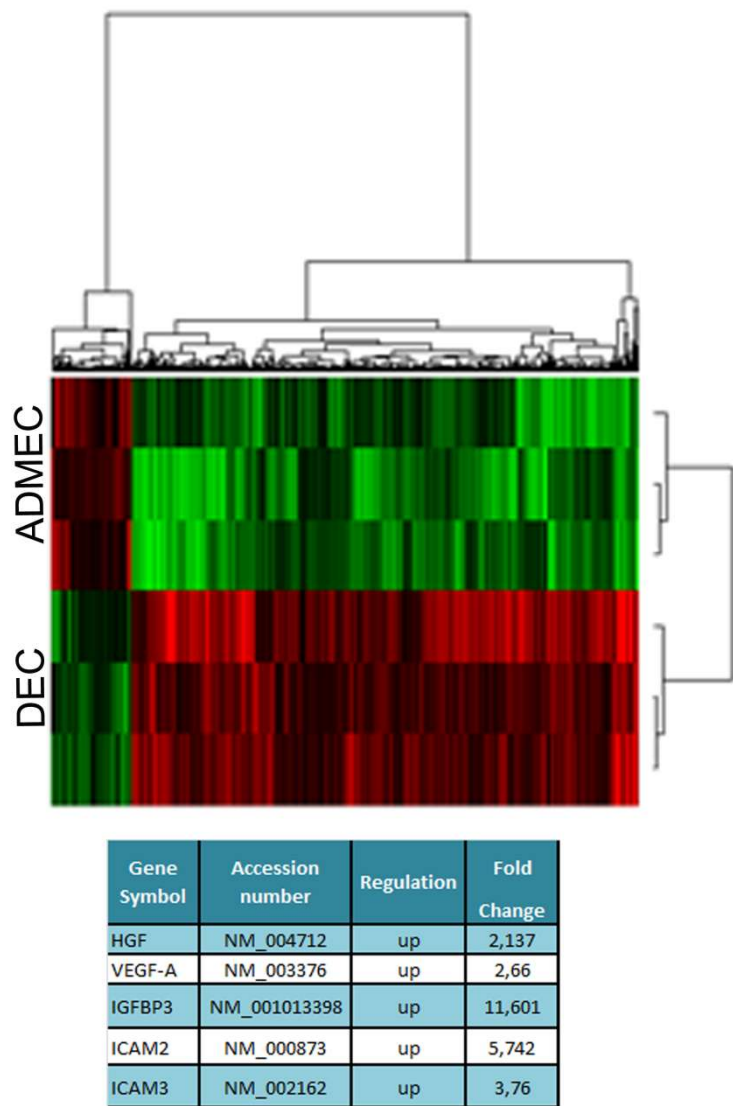

**Supplemental Figure S1.** Overview of gene expression patterns of three populations of DECs and ADMECs. Heatmap of the microarray cluster of 1909 genes. Genes up-regulated and down-regulated in DECs were selected based on fold-change ( $\geq 1$  or  $< 1$ ).

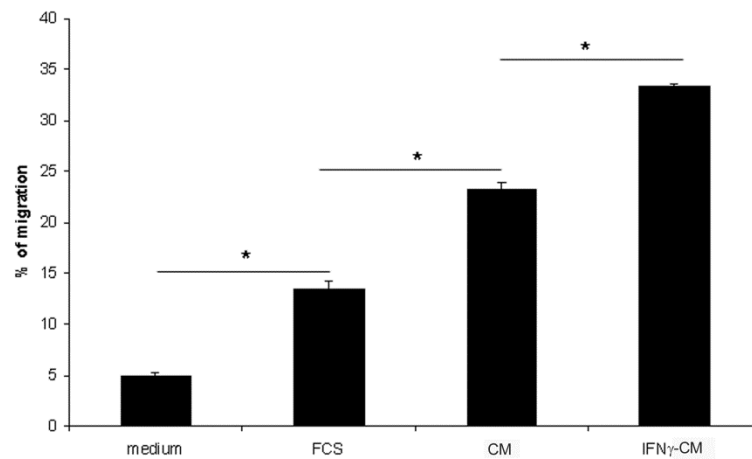

**Supplemental Figure S2.** Effect of the conditioned media of DEC $\gamma$ s treated with IFN- $\gamma$  on the transendothelial migration of LM. LM were added to the upper compartment of the TW inserts and allowed to migrate through DEC $\gamma$ s. FCS were used as a positive control, while medium without serum was used as negative control. The data are expressed as percentage of LM migrated through the endothelium and represent the mean  $\pm$  SD of triplicate samples from five separate experiments. \*  $p < 0.05$ .

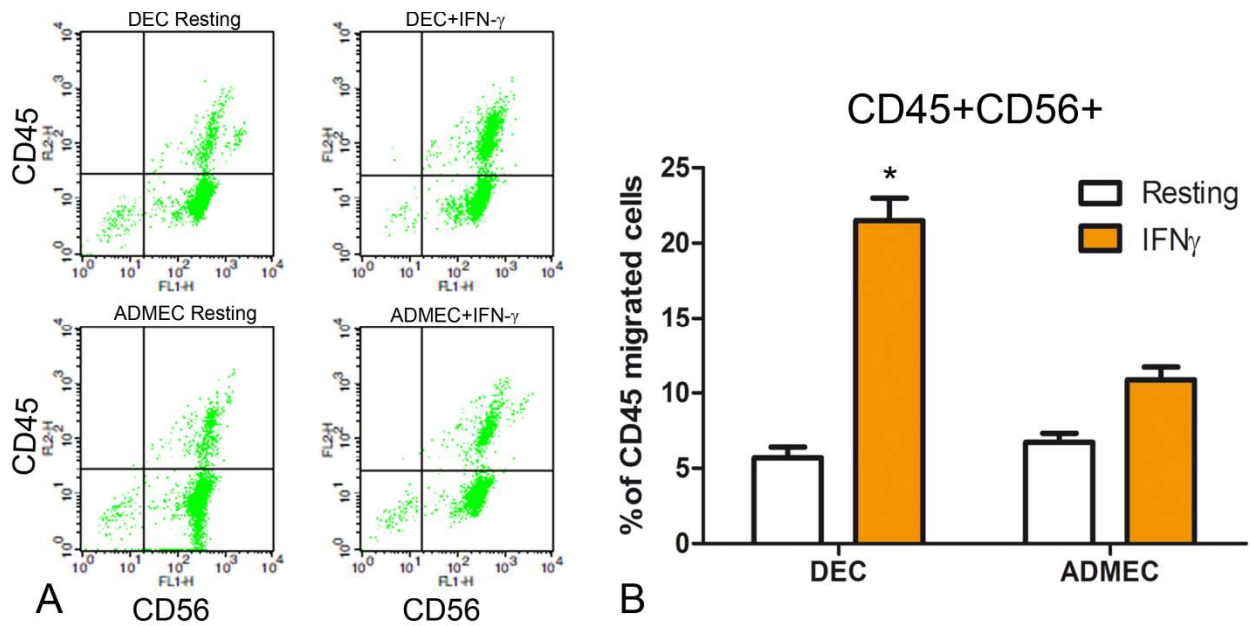

**Supplemental Figure S3.** Transendothelial migration of PBDM across untreated and IFN $\gamma$ -treated DEC and ADMEC. (A) Representative dot plots for flow cytometry of trans-endothelial migrated LM, stained for CD45 and CD56. (D) Quantitation of the percent of total migrated LM cells, positive for both CD45 and CD56 by flow cytometry. The data represent the mean  $\pm$  SD of duplicate samples from three separate experiments \*  $p < 0.05$ .

**Supplemental Table S1.** Primer used for qPCR analysis.

| Gene   | Primers | Sequence 5'>3'        | Annealing Temperature (°C) | Amplicon Size (bp) | Gene Bank Accession Number |
|--------|---------|-----------------------|----------------------------|--------------------|----------------------------|
| 18S    | Forward | atccctgaaaagttccagca  | 60                         | 154                | NM_022551                  |
|        | Reverse | ccctcttggtgaggtcaatg  |                            |                    |                            |
| HGF    | Forward | AACGACAAGAACCCACACGTC | 62                         | 182                | NM_004712                  |
|        | Reverse | GGCCTGGATCAGGTACAGGA  |                            |                    |                            |
| VEGF-A | Forward | GCAGAATCATCACGAAGTGG  | 59                         | 212                | NM_003376                  |
|        | Reverse | GCATGGTGATGTTGGACTCC  |                            |                    |                            |
| IGFBP3 | Forward | CCCTCCATTCAAAGATAATC  | 62                         | 298                | NM_001013398               |
|        | Reverse | TCCACACACCAGCAGAAG    |                            |                    |                            |
| ICAM-2 | Forward | ATCTCCCATGACACGGTCCT  | 60                         | 162                | NM_002162                  |
|        | Reverse | CACCCTGCACTCAATGGTGAA |                            |                    |                            |
| ICAM-3 | Forward | GTGTTTGAAGGAAGGCTCC   | 60                         | 113                | NM_002162                  |
|        | Reverse | TGTATTGCCTCGTGAGCTG   |                            |                    |                            |
